# Supplementary material for: Mitochondrial-targeted fluorophore: synthesis, property and cells imaging
Source: Royal Society of Chemistry journal article supplement (doi:10.1039/d4nj00609g), 2024-01-01
Supplement: d4nj00609g1.pdf [file d4nj00609g1.pdf]

## Mitochondrial-targeted fluorophore: synthesis, property and cells imaging

Jindao Liu<sup>a,b</sup>, Lin Kong<sup>a,b</sup> and Yi Chen<sup>a,b\*</sup>

<sup>a</sup>Key Laboratory of Photochemical Conversion and Optoelectronic Materials, Technical Institute of Physics and Chemistry, The Chinese Academy of Sciences, Beijing, 100190, China. Fax: 86 10

6487 9375; Tel: 86 10 8254 3595; E-mail: yichen@mail.ipc.ac.cn

<sup>b</sup>University of Chinese Academy of Sciences, Beijing, 100190, China

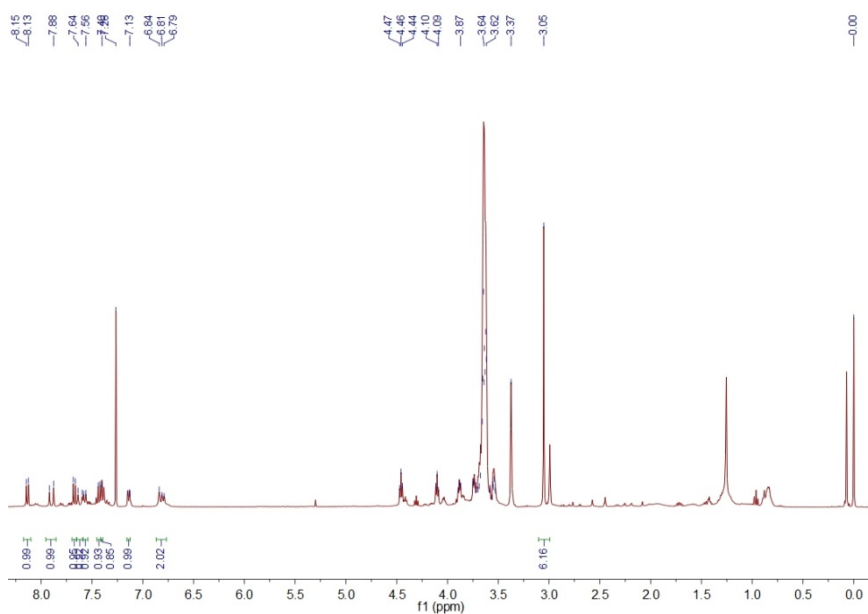

Figure S1. <sup>1</sup>H-NMR spectroscopy of **BQ-mPEG** (solvent: CDCl<sub>3</sub>).

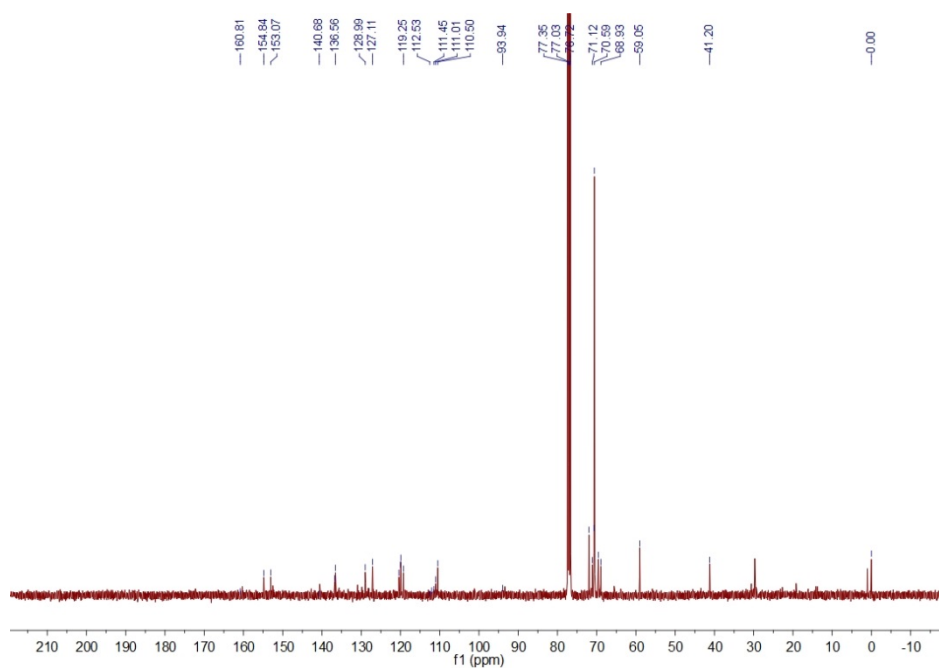

Figure S2.  $^{13}\text{C}$ -NMR spectroscopy of **BQ-mPEG** (solvent:  $\text{CDCl}_3$ ).

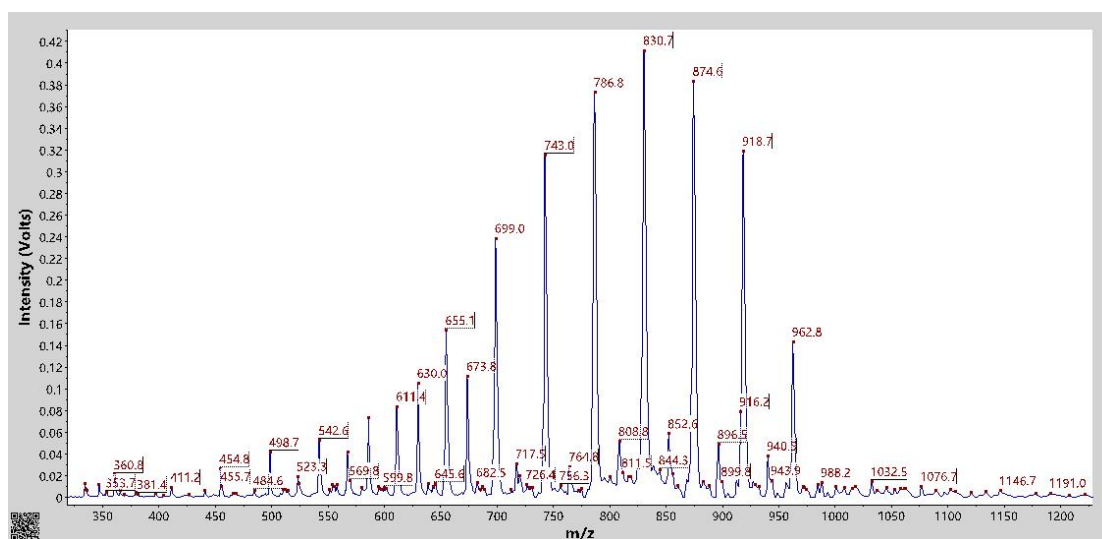

Figure S3. HR-MS spectroscopy of **BQ-mPEG**.
